# Supplementary material for: Economic Crisis Impact and Social Determinants of Perinatal Outcomes and Infant Mortality in Greece
Source: PubMed Central journal article supplement (PMC7557366; doi:10.3390/ijerph17186606), 2020-09-11
Supplement: ijerph-17-06606-s001.pdf [file ijerph-17-06606-s001.pdf]

**Table S1.** Trends in perinatal and infant mortality rates, Greece, 2000-16.

| <b>Year</b> | <b>Stillbirth<br/>Rate</b> | <b>Perinatal<br/>Mortality<br/>Rate</b> | <b>Infant<br/>Mortality<br/>Rate</b> | <b>Neonatal<br/>Mortality<br/>Rate</b> | <b>Post-<br/>neonatal<br/>Mortality<br/>Rate</b> | <b>Low<br/>Birthweight<br/>Rate</b> | <b>Maternal<br/>Mortality<br/>Rate</b> |
|-------------|----------------------------|-----------------------------------------|--------------------------------------|----------------------------------------|--------------------------------------------------|-------------------------------------|----------------------------------------|
| 2000        | 5.20                       | 7.88                                    | 5.43                                 | 3.88                                   | 1.55                                             | 80.87                               | 0.00                                   |
| 2001        | 5.72                       | 8.00                                    | 5.10                                 | 3.56                                   | 1.54                                             | 83.70                               | 1.96                                   |
| 2002        | 4.90                       | 7.22                                    | 5.12                                 | 3.50                                   | 1.62                                             | 82.53                               | 0.97                                   |
| 2003        | 4.80                       | 6.58                                    | 4.02                                 | 2.70                                   | 1.32                                             | 77.83                               | 1.92                                   |
| 2004        | 4.49                       | 6.28                                    | 4.06                                 | 2.62                                   | 1.44                                             | 86.48                               | 1.89                                   |
| 2005        | 3.90                       | 5.66                                    | 3.80                                 | 2.64                                   | 1.16                                             | 80.30                               | 0.00                                   |
| 2006        | 3.34                       | 4.95                                    | 3.70                                 | 2.51                                   | 1.20                                             | 82.76                               | 1.79                                   |
| 2007        | 3.86                       | 5.32                                    | 3.55                                 | 2.25                                   | 1.30                                             | 87.52                               | 1.79                                   |
| 2008        | 3.30                       | 4.40                                    | 2.65                                 | 1.79                                   | 0.86                                             | 84.21                               | 0.00                                   |
| 2009        | 4.26                       | 5.50                                    | 3.15                                 | 2.02                                   | 1.13                                             | 95.94                               | 0.85                                   |
| 2010        | 4.34                       | 5.86                                    | 3.80                                 | 2.47                                   | 1.32                                             | 99.88                               | 4.36                                   |
| 2011        | 4.03                       | 5.37                                    | 3.35                                 | 2.20                                   | 1.16                                             | 97.70                               | 2.82                                   |
| 2012        | 4.42                       | 5.64                                    | 2.92                                 | 1.88                                   | 1.04                                             | 97.62                               | 1.00                                   |
| 2013        | 3.98                       | 5.79                                    | 3.66                                 | 2.63                                   | 1.03                                             | 93.54                               | 0.00                                   |
| 2014        | 3.82                       | 5.60                                    | 3.74                                 | 2.57                                   | 1.17                                             | 93.69                               | 4.34                                   |
| 2015        | 3.39                       | 5.33                                    | 3.96                                 | 2.83                                   | 1.13                                             | 92.85                               | 3.27                                   |
| 2016        | 3.64                       | 5.41                                    | 4.17                                 | 2.81                                   | 1.33                                             | 93.90                               | 3.23                                   |

**Table S2.** Infant mortality, perinatal mortality, average gross domestic product per capita, adjusted gross disposable income per capita, unemployment rates and public health expenditure per capita in affected European countries (2006-2016).

|                                                                                                                                                             | <b>Greece</b> | <b>Hungary</b> | <b>Ireland</b> | <b>Italy</b> | <b>Poland</b> | <b>Portugal</b> | <b>Spain</b> |
|-------------------------------------------------------------------------------------------------------------------------------------------------------------|---------------|----------------|----------------|--------------|---------------|-----------------|--------------|
| <i>Real Gross Domestic product per capita (euro per capita) <sup>(1)</sup></i>                                                                              |               |                |                |              |               |                 |              |
| 2006-8                                                                                                                                                      | 22,427        | 10,400         | 40,100         | 28,480       |               | 17,110          | 24,193       |
| 2009-11                                                                                                                                                     | 20,117        | 9,940          | 36,617         | 26,847       | 9,440         | 16,807          | 22,970       |
| 2012-14                                                                                                                                                     | 17,027        | 10,310         | 37,863         | 25,663       | 10,233        | 16,140          | 22,043       |
| 2015-6                                                                                                                                                      | 17,095        | 11,270         | 50,090         | 25,830       | 11,090        | 16,815          | 23,420       |
| <i>Adjusted gross disposable income of households per capita <sup>(1)</sup></i>                                                                             |               |                |                |              |               |                 |              |
| 2006-8                                                                                                                                                      | 18,952        | 11,376         | 20,704         | 21,427       | 10,356        | 16,532          | 18,492       |
| 2009-11                                                                                                                                                     | 17,537        | 11,917         | 19,310         | 21,262       | 12,243        | 16,491          | 17,883       |
| 2012-14                                                                                                                                                     | 14,842        | 13,110         | 19,116         | 20,780       | 13,990        | 16,433          | 17,527       |
| 2015-6                                                                                                                                                      | 14,849        | 13,936         | 20,039         | 21,482       | 15,240        | 17,659          | 19,209       |
| <i>Unemployment rate (% of the active population) <sup>(1)</sup></i>                                                                                        |               |                |                |              |               |                 |              |
| 2006-8                                                                                                                                                      | 8.4           | 7.6            | 5.5            | 6.5          | 10.2          | 8.9             | 9.3          |
| 2009-11                                                                                                                                                     | 13.4          | 10.7           | 14.2           | 8.2          | 9.2           | 11.9            | 19.7         |
| 2012-14                                                                                                                                                     | 26.2          | 9.6            | 13.7           | 11.8         | 9.8           | 15.4            | 25.1         |
| 2015-6                                                                                                                                                      | 24.3          | 6.0            | 9.2            | 11.8         | 6.9           | 11.9            | 20.9         |
| <i>Long-term unemployment (% of the active population) <sup>(1)</sup></i>                                                                                   |               |                |                |              |               |                 |              |
| 2006-8                                                                                                                                                      | 4.3           | 3.5            | 1.5            | 3.1          | 5.0           | 3.8             | 1.8          |
| 2009-11                                                                                                                                                     | 6.1           | 5.0            | 6.4            | 3.9          | 3.0           | 5.4             | 6.8          |
| 2012-14                                                                                                                                                     | 17.5          | 4.5            | 7.9            | 6.7          | 4.1           | 8.5             | 12.3         |
| 2015-6                                                                                                                                                      | 17.6          | 2.8            | 4.8            | 6.8          | 2.6           | 6.7             | 10.5         |
| <i>Per capital public health expenditure (government schemes and compulsory contributory health care financing schemes, euro per capita) <sup>(2)</sup></i> |               |                |                |              |               |                 |              |
| 2006-8                                                                                                                                                      | ...           | 512            | ...            | ...          | ...           | 1,040           | 1,384        |
| 2009-11                                                                                                                                                     | 1,283         | 491            | 2,895          | ...          | ...           | 1,129           | 1,561        |
| 2012-14                                                                                                                                                     | 878           | 499            | 2,894          | 1,834        | 472           | 985             | 1,426        |
| 2015-6                                                                                                                                                      | 797           | 549            | 3,029          | 1,834        | 507           | 1,055           | 1,523        |

Sources: <sup>(1)</sup> World Bank. World Development Indicators.

<https://databank.worldbank.org/source/world-development-indicators>.

<sup>(2)</sup> Eurostat. Health care expenditure by financing scheme.

[https://appsso.eurostat.ec.europa.eu/nui/show.do?dataset=hlth\\_sha11\\_hf&lang=en](https://appsso.eurostat.ec.europa.eu/nui/show.do?dataset=hlth_sha11_hf&lang=en)
